# Supplementary material
Source: PubMed Central journal article supplement (PMC3590039)
Supplement: supp_kws225_kws225_Web_Tables.pdf [file supp_kws225_kws225_Web_Tables.pdf]

Web Table 1. List and Prevalence of 48 Chemicals Examined for Risk of Total Prostate Cancer

| Pesticide           | Type             | Prevalence of use (% Ever) |                                   | Quartile Medians-Total Prostate Cancer <sup>b</sup> |      |       |       |
|---------------------|------------------|----------------------------|-----------------------------------|-----------------------------------------------------|------|-------|-------|
|                     |                  | Prostate Cases n (%)       | Rest of Cohort <sup>a</sup> n (%) | Q1                                                  | Q2   | Q3    | Q4    |
| Atrazine            | Herbicide (TR)   | 1342 (68.4)                | 36,752 (70.1)                     | 12.0                                                | 48.8 | 108.5 | 336.0 |
| Dicamba             | Herbicide        | 838 (42.7)                 | 25,516 (48.7)                     | 8.8                                                 | 24.5 | 58.8  | 224.8 |
| Cyanazine           | Herbicide (TR)   | 675 (34.4)                 | 19,542 (37.3)                     | 8.8                                                 | 24.5 | 56.0  | 224.8 |
| Chlorimuron-ethyl   | Herbicide        | 303 (15.4)                 | 8,238 (15.7)                      | 8.8                                                 | 30.0 |       |       |
| Metolachlor         | Herbicide        | 768 (39.1)                 | 23,757 (45.3)                     | 8.8                                                 | 24.5 | 56.0  | 224.8 |
| EPTC                | Herbicide        | 300 (15.3)                 | 9,552 (18.2)                      | 8.8                                                 | 56.0 |       |       |
| Alachlor            | Herbicide        | 917 (46.7)                 | 24,548 (46.8)                     | 8.8                                                 | 24.5 | 86.0  | 236.0 |
| Metribuzin          | Herbicide        | 372 (19.0)                 | 8,750 (16.7)                      | 8.8                                                 | 20.0 | 24.5  | 103.3 |
| Paraquat            | Herbicide        | 178 (9.1)                  | 4,453 (8.5)                       | 2.5                                                 | 8.8  | 24.5  | 108.5 |
| Petroleum Oil       | Herbicide        | 206 (10.5)                 | 4,838 (9.2)                       | 8.8                                                 | 24.5 | 56.0  | 236.0 |
| Pendimethalin       | Herbicide        | 408 (20.1)                 | 12,323 (23.5)                     | 7.0                                                 | 15.0 | 24.5  | 105.0 |
| Imazethapyr         | Herbicide        | 642 (32.7)                 | 20,810 (39.7)                     | 8.8                                                 | 24.5 | 56.0  |       |
| Glyphosate          | Herbicide        | 1464 (74.6)                | 42,420 (80.9)                     | 8.8                                                 | 24.0 | 56.0  | 224.8 |
| 2,4,5 T P           | Herbicide        | 51 (2.6)                   | 1,061 (2.0)                       | 8.8                                                 | 24.5 | 108.5 |       |
| Butylate            | Herbicide        | 241 (12.3)                 | 5,764 (11.0)                      | 8.8                                                 | 24.5 | 56.0  | 116.0 |
| Trifluralin         | Herbicide        | 893 (45.5)                 | 25,245 (48.1)                     | 14.5                                                | 50.8 | 108.5 | 236.0 |
| 2,4-D               | Herbicide        | 1469 (74.9)                | 39,677 (75.7)                     | 10.0                                                | 50.8 | 118.5 | 396.0 |
| 2,4,5 T             | Herbicide        | 245 (12.5)                 | 3,860 (7.4)                       | 8.8                                                 | 50.8 |       |       |
| Permethrin (crop)   | Insecticide      | 196 (10.0)                 | 7,587 (14.5)                      | 8.8                                                 | 55.7 |       |       |
| Permethrin (animal) | Insecticide      | 177 (9.0)                  | 6,540 (12.5)                      | 8.8                                                 | 56.0 |       |       |
| Terbufos            | Insecticide (OP) | 639 (32.6)                 | 17,838 (34.0)                     | 12.0                                                | 48.8 | 108.5 | 336.0 |
| Fonofos             | Insecticide (OP) | 384 (19.6)                 | 9,681 (18.5)                      | 8.8                                                 | 24.5 | 50.8  | 116.0 |
| Lindane             | Insecticide (OC) | 157 (8.0)                  | 3,215 (6.1)                       | 8.8                                                 | 20.0 | 24.5  | 108.0 |
| Carbofuran          | Insecticide      | 534 (27.2)                 | 12,292 (23.4)                     | 8.8                                                 | 24.5 | 108.5 |       |
| Chlorpyrifos        | Insecticide (OP) | 668 (34.1)                 | 20,233 (38.6)                     | 8.8                                                 | 24.0 | 50.8  | 116.0 |
| Malathion           | Insecticide (OP) | 746 (38.1)                 | 17,212 (32.8)                     | 8.8                                                 | 20.0 | 38.8  | 116.5 |
| Parathion           | Insecticide (OP) | 99 (5.1)                   | 1,592 (3.0)                       | 8.8                                                 | 24.5 | 116.0 |       |
| Carbaryl            | Insecticide      | 558 (28.4)                 | 11,601 (22.1)                     | 8.8                                                 | 20.0 | 45.0  | 175.0 |
| Diazinon            | Insecticide (OP) | 258 (13.2)                 | 5,626 (10.7)                      | 8.8                                                 | 38.8 |       |       |
| Aldicarb            | Insecticide      | 92 (4.7)                   | 2,315 (4.4)                       | 8.0                                                 | 24.5 | 103.3 |       |
| Phorate             | Insecticide (OP) | 304 (15.5)                 | 6,418 (12.2)                      | 8.8                                                 | 24.5 | 56.0  | 116.0 |
| Aldrin              | Insecticide (OC) | 257 (13.1)                 | 3,315 (6.3)                       | 8.8                                                 | 24.5 | 50.8  | 103.3 |
| Chlordane           | Insecticide (OC) | 233 (11.9)                 | 3,917 (7.5)                       | 8.8                                                 | 24.5 |       |       |
| Dieldrin            | Insecticide (OC) | 56 (2.9)                   | 725 (1.4)                         | 8.8                                                 | 24.5 |       |       |
| DDT                 | Insecticide (OC) | 384 (19.6)                 | 4,332 (8.3)                       | 8.8                                                 | 24.5 | 116.0 |       |
| Heptachlor          | Insecticide (OC) | 178 (9.1)                  | 2,402 (4.6)                       | 8.8                                                 | 24.5 | 56.0  |       |
| Toxaphene           | Insecticide (OC) | 153 (7.8)                  | 2,319 (4.4)                       | 8.8                                                 | 24.5 | 108.5 |       |
| Coumaphos           | Insecticide (OP) | 139 (7.1)                  | 3,614 (6.9)                       | 8.8                                                 | 20.0 | 38.8  | 176.5 |
| DDVP                | Insecticide (OP) | 172 (8.8)                  | 4,563 (8.7)                       | 8.8                                                 | 24.5 | 103.3 | 752.3 |
| Methyl Bromide      | Fumigant         | 281 (14.3)                 | 7,374 (14.1)                      | 3.5                                                 | 15.5 | 35.0  | 122.5 |
| Aluminum Phosphide  | Fumigant         | 30 (1.5)                   | 1,271 (2.4)                       | 3.5                                                 | 24.5 |       |       |
| Mix 80/20           | Fumigant         | 72 (3.4)                   | 877 (1.7)                         | 3.5                                                 | 12.3 | 54.3  |       |
| Ethylene Dibromide  | Fumigant         | 37 (1.9)                   | 929 (1.8)                         | 3.5                                                 | 15.5 | 87.5  |       |
| Benomyl             | Fungicide        | 82 (4.2)                   | 1,790 (3.4)                       | 3.5                                                 | 24.5 | 108.5 |       |
| Chlorothalonil      | Fungicide        | 142 (7.2)                  | 4,395 (8.4)                       | 7.9                                                 | 28.0 | 64.0  | 200.0 |
| Captan              | Fungicide        | 170 (8.7)                  | 4,879 (9.3)                       | 0.3                                                 | 7.8  | 64.0  |       |
| Maneb/Mancozeb      | Fungicide        | 79 (4.0)                   | 1,720 (3.3)                       | 7.0                                                 | 30.0 | 224.8 |       |
| Metalaxyl           | Fungicide        | 197 (10.0)                 | 4,884 (9.3)                       | 1.0                                                 | 12.3 | 25.0  | 59.3  |

Abbreviations: Triazine (TR); Organophosphate (OP); Organochlorine (OC); quartile 1 (Q1); quartile 2 (Q2); quartile 3 (Q3); quartile 4 (Q4).

<sup>a</sup> Male applicators with no previous history of cancer and complete follow-up.

<sup>b</sup> Tertile cutpoints or median cutpoints provided for some chemicals.

Web Table 2. Cumulative Lifetime Pesticide Exposure and Risk of Total and Aggressive Prostate Cancer in the AHS, 2007

|                      | Intensity Weighted Days |                          | Intensity Weighted Days     |                          |
|----------------------|-------------------------|--------------------------|-----------------------------|--------------------------|
|                      | Total PCA               |                          | Aggressive PCA <sup>a</sup> |                          |
|                      | Cases <sup>b</sup>      | RR <sup>c</sup> (95% CI) | Cases <sup>b</sup>          | RR <sup>c</sup> (95% CI) |
| <u>Dicamba</u>       |                         |                          |                             |                          |
| Nonexposed           | 837                     | Ref                      | 380                         | Ref                      |
| Q1                   | 212                     | 0.97 (0.82, 1.14)        | 102                         | 0.85 (0.67, 1.07)        |
| Q2                   | 208                     | 0.89 (0.75, 1.05)        | 99                          | 0.92 (0.72, 1.16)        |
| Q3                   | 209                     | 0.90 (0.76, 1.06)        | 100                         | 0.82 (0.64, 1.04)        |
| Q4                   | 209                     | 1.04 (0.88, 1.22)        | 100                         | 0.96 (0.75, 1.22)        |
| p-trend              |                         | 0.50                     |                             | 0.98                     |
| <u>Chlorimuron</u>   |                         |                          |                             |                          |
| Nonexposed           | 718                     | Ref                      | 348                         | Ref                      |
| Q1                   | 76                      | 1.01 (0.79, 1.29)        | 32                          | 0.90 (0.62, 1.31)        |
| Q2                   | 76                      | 1.09 (0.86, 1.39)        | 31                          | 1.20 (0.83, 1.74)        |
| Q3                   | 76                      | 1.02 (0.80, 1.32)        | 31                          | 0.80 (0.53, 1.21)        |
| Q4                   | 75                      | 0.89 (0.70, 1.13)        | 31                          | 0.74 (0.51, 1.08)        |
| p-trend              |                         | 0.36                     |                             | 0.10                     |
| <u>Metolachlor</u>   |                         |                          |                             |                          |
| Nonexposed           | 910                     | Ref                      | 427                         | Ref                      |
| Q1                   | 192                     | 1.04 (0.88, 1.23)        | 93                          | 1.03 (0.81, 1.31)        |
| Q2                   | 192                     | 1.05 (0.89, 1.23)        | 89                          | 1.00 (0.79, 1.26)        |
| Q3                   | 192                     | 0.98 (0.83, 1.16)        | 91                          | 0.95 (0.74, 1.20)        |
| Q4                   | 192                     | 0.91 (0.78, 1.07)        | 91                          | 0.98 (0.78, 1.24)        |
| p-trend              |                         | 0.21                     |                             | 0.81                     |
| <u>EPTC</u>          |                         |                          |                             |                          |
| Nonexposed           | 1352                    | Ref                      | 624                         | Ref                      |
| Q1                   | 75                      | 1.00 (0.79, 1.26)        | 39                          | 1.01 (0.72, 1.41)        |
| Q2                   | 76                      | 1.25 (0.99, 1.58)        | 37                          | 1.29 (0.93, 1.81)        |
| Q3                   | 74                      | 0.93 (0.73, 1.17)        | 38                          | 0.97 (0.70, 1.35)        |
| Q4                   | 75                      | 0.93 (0.73, 1.17)        | 38                          | 1.01 (0.73, 1.41)        |
| p-trend              |                         | 0.48                     |                             | 0.98                     |
| <u>Alachlor</u>      |                         |                          |                             |                          |
| Nonexposed           | 745                     | Ref                      | 362                         | Ref                      |
| Q1                   | 230                     | 0.96 (0.83, 1.12)        | 104                         | 0.89 (0.71, 1.12)        |
| Q2                   | 231                     | 1.03 (0.89, 1.20)        | 104                         | 0.95 (0.76, 1.18)        |
| Q3                   | 227                     | 0.99 (0.85, 1.15)        | 104                         | 0.96 (0.77, 1.20)        |
| Q4                   | 229                     | 0.99 (0.86, 1.15)        | 103                         | 0.90 (0.73, 1.13)        |
| p-trend              |                         | 0.96                     |                             | 0.49                     |
| <u>Metribuzin</u>    |                         |                          |                             |                          |
| Nonexposed           | 633                     | Ref                      | 295                         | Ref                      |
| Q1                   | 93                      | 0.97 (0.77, 1.21)        | 45                          | 0.86 (0.62, 1.19)        |
| Q2                   | 93                      | 1.17 (0.93, 1.47)        | 42                          | 1.03 (0.73, 1.45)        |
| Q3                   | 93                      | 0.94 (0.75, 1.17)        | 44                          | 0.99 (0.71, 1.38)        |
| Q4                   | 93                      | 1.08 (0.87, 1.35)        | 43                          | 1.11 (0.80, 1.54)        |
| p-trend              |                         | 0.57                     |                             | 0.46                     |
| <u>Paraquat</u>      |                         |                          |                             |                          |
| Nonexposed           | 844                     | Ref                      | 391                         | Ref                      |
| Q1                   | 45                      | 0.96 (0.71, 1.31)        | 21                          | 0.92 (0.57, 1.49)        |
| Q2                   | 44                      | 0.97 (0.71, 1.33)        | 20                          | 0.93 (0.58, 1.49)        |
| Q3                   | 45                      | 0.93 (0.68, 1.27)        | 21                          | 1.32 (0.83, 2.08)        |
| Q4                   | 44                      | 1.03 (0.75, 1.42)        | 20                          | 1.30 (0.80, 2.10)        |
| p-trend              |                         | 0.88                     |                             | 0.22                     |
| <u>Petroleum Oil</u> |                         |                          |                             |                          |

|                      |      |                   |     |                   |
|----------------------|------|-------------------|-----|-------------------|
| Nonexposed           | 796  | Ref               | 364 | Ref               |
| Q1                   | 52   | 0.96 (0.71, 1.28) | 27  | 0.87 (0.57, 1.31) |
| Q2                   | 52   | 1.17 (0.88, 1.55) | 26  | 1.34 (0.89, 2.03) |
| Q3                   | 51   | 1.05 (0.79, 1.39) | 26  | 1.30 (0.87, 1.96) |
| Q4                   | 51   | 1.14 (0.86, 1.52) | 26  | 1.30 (0.87, 1.93) |
| p-trend              |      | 0.34              |     | 0.14              |
| <u>Pendimethalin</u> |      |                   |     |                   |
| Nonexposed           | 649  | Ref               | 305 | Ref               |
| Q1                   | 102  | 0.84 (0.68, 1.05) | 50  | 0.80 (0.59, 1.10) |
| Q2                   | 102  | 0.92 (0.74, 1.15) | 46  | 1.02 (0.74, 1.42) |
| Q3                   | 102  | 0.90 (0.72, 1.13) | 48  | 0.97 (0.70, 1.34) |
| Q4                   | 102  | 1.16 (0.93, 1.43) | 48  | 1.32 (0.97, 1.80) |
| p-trend              |      | 0.15              |     | 0.06              |
| <u>Imazethapyr</u>   |      |                   |     |                   |
| Nonexposed           | 1019 | Ref               | 470 | Ref               |
| Q1                   | 161  | 1.00 (0.84, 1.20) | 78  | 0.95 (0.73, 1.23) |
| Q2                   | 160  | 1.06 (0.88, 1.26) | 77  | 0.89 (0.69, 1.16) |
| Q3                   | 161  | 1.11 (0.92, 1.32) | 77  | 0.97 (0.75, 1.25) |
| Q4                   | 160  | 1.00 (0.84, 1.20) | 77  | 1.08 (0.84, 1.38) |
| p-trend              |      | 0.86              |     | 0.51              |
| <u>Glyphosate</u>    |      |                   |     |                   |
| Nonexposed           | 385  | Ref               | 188 | Ref               |
| Q1                   | 366  | 0.91 (0.79, 1.06) | 170 | 0.93 (0.74, 1.16) |
| Q2                   | 366  | 0.96 (0.83, 1.12) | 169 | 0.91 (0.73, 1.13) |
| Q3                   | 366  | 1.01 (0.87, 1.17) | 170 | 1.01 (0.82, 1.25) |
| Q4                   | 366  | 0.99 (0.86, 1.15) | 169 | 0.94 (0.75, 1.18) |
| <u>2,4,5-TP</u>      |      |                   |     |                   |
| Nonexposed           | 939  | Ref               | 434 | Ref               |
| Q1                   | 17   | 0.73 (0.44, 1.21) | 8   | 0.93 (0.44, 1.95) |
| Q2                   | 18   | 1.14 (0.72, 1.79) | 8   | 1.49 (0.74, 3.01) |
| Q3                   | 16   | 0.83 (0.52, 1.35) | 8   | 1.04 (0.51, 2.09) |
| Q4                   |      |                   | 7   | 1.31 (0.62, 2.77) |
| p-trend              |      | 0.50              |     | 0.46              |
| <u>Butylate</u>      |      |                   |     |                   |
| Nonexposed           | 756  | Ref               | 348 | Ref               |
| Q1                   | 62   | 0.74 (0.57, 0.96) | 30  | 0.71 (0.48, 1.05) |
| Q2                   | 61   | 0.90 (0.69, 1.17) | 30  | 1.03 (0.71, 1.51) |
| Q3                   | 58   | 1.24 (0.95, 1.63) | 30  | 1.38 (0.94, 2.02) |
| Q4                   | 60   | 1.20 (0.92, 1.56) | 29  | 1.28 (0.87, 1.87) |
| p-trend              |      | 0.08              |     | 0.08              |
| <u>Trifluralin</u>   |      |                   |     |                   |
| Nonexposed           | 784  | Ref               | 357 | Ref               |
| Q1                   | 224  | 0.94 (0.81, 1.09) | 109 | 0.95 (0.76, 1.19) |
| Q2                   | 223  | 1.05 (0.89, 1.22) | 107 | 1.04 (0.83, 1.30) |
| Q3                   | 223  | 0.98 (0.84, 1.14) | 108 | 1.05 (0.84, 1.31) |
| Q4                   | 223  | 0.97 (0.83, 1.13) | 108 | 0.99 (0.79, 1.24) |
| p-trend              |      | 0.78              |     | 0.96              |
| <u>2,4-D</u>         |      |                   |     |                   |
| Nonexposed           | 392  | Ref               | 186 | Ref               |
| Q1                   | 369  | 0.99 (0.85, 1.15) | 173 | 0.95 (0.76, 1.18) |
| Q2                   | 366  | 0.97 (0.83, 1.14) | 173 | 0.85 (0.67, 1.07) |
| Q3                   | 367  | 1.01 (0.87, 1.18) | 173 | 0.88 (0.71, 1.10) |
| Q4                   | 367  | 0.95 (0.82, 1.11) | 172 | 0.96 (0.76, 1.20) |
| p-trend              |      | 0.52              |     | 0.79              |

|                           |      |                   |     |                   |
|---------------------------|------|-------------------|-----|-------------------|
| <u>2,4,5-T</u>            |      |                   |     |                   |
| Nonexposed                | 744  | Ref               | 343 | Ref               |
| Q1                        | 62   | 1.32 (1.02, 1.71) | 31  | 1.15 (0.78, 1.70) |
| Q2                        | 62   | 1.09 (0.84, 1.42) | 31  | 1.20 (0.81, 1.77) |
| Q3                        | 60   | 0.96 (0.73, 1.25) | 29  | 1.00 (0.68, 1.46) |
| Q4                        | 61   | 0.82 (0.63, 1.06) | 30  | 0.87 (0.59, 1.26) |
| p-trend                   |      | 0.10              |     | 0.42              |
| <u>Permethrin crop</u>    |      |                   |     |                   |
| Nonexposed                | 1468 | Ref               | 693 | Ref               |
| Q1                        | 49   | 0.93 (0.69, 1.23) | 22  | 0.95 (0.60, 1.49) |
| Q2                        | 49   | 1.07 (0.80, 1.43) | 22  | 1.07 (0.69, 1.66) |
| Q3                        | 49   | 0.86 (0.64, 1.16) | 22  | 0.65 (0.41, 1.03) |
| Q4                        | 49   | 1.05 (0.79, 1.40) | 21  | 1.33 (0.86, 2.05) |
| p-trend                   |      | 0.85              |     | 0.38              |
| <u>Permethrin animal</u>  |      |                   |     |                   |
| Nonexposed                | 1529 | Ref               | 709 | Ref               |
| Q1                        | 45   | 0.98 (0.69, 1.37) | 24  | 1.07 (0.67, 1.70) |
| Q2                        | 44   | 1.16 (0.83, 1.63) | 23  | 1.11 (0.71, 1.74) |
| Q3                        | 44   | 1.11 (0.81, 1.51) | 24  | 1.09 (0.72, 1.64) |
| Q4                        | 44   | 0.84 (0.62, 1.13) | 23  | 1.11 (0.73, 1.68) |
| p-trend                   |      | 0.32              |     | 0.58              |
| <u>Carbofuran</u>         |      |                   |     |                   |
| Nonexposed                | 1128 | Ref               | 508 | Ref               |
| Q1                        | 140  | 0.97 (0.81, 1.16) | 69  | 1.11 (0.85, 1.44) |
| Q2                        | 127  | 1.23 (1.02, 1.47) | 66  | 1.11 (0.87, 1.43) |
| Q3                        | 134  | 1.13 (0.94, 1.36) | 64  | 1.13 (0.86, 1.47) |
| Q4                        | 133  | 0.88 (0.74, 1.05) | 66  | 1.22 (0.95, 1.58) |
| p-trend                   |      | 0.24              |     | 0.12              |
| <u>Carbaryl</u>           |      |                   |     |                   |
| Nonexposed                | 483  | Ref               | 237 | Ref               |
| Q1                        | 140  | 1.04 (0.86, 1.26) | 67  | 1.05 (0.78, 1.42) |
| Q2                        | 139  | 1.13 (0.92, 1.38) | 60  | 1.03 (0.76, 1.40) |
| Q3                        | 140  | 1.25 (1.02, 1.53) | 64  | 1.19 (0.88, 1.60) |
| Q4                        | 139  | 0.91 (0.73, 1.13) | 63  | 0.99 (0.71, 1.39) |
| p-trend                   |      | 0.18              |     | 0.85              |
| <u>Aldicarb</u>           |      |                   |     |                   |
| Nonexposed                | 913  | Ref               | 436 | Ref               |
| Q1                        | 23   | 0.95 (0.62, 1.44) | 10  | 0.87 (0.39, 1.93) |
| Q2                        | 23   | 1.73 (1.13, 2.65) | 10  | 2.99 (1.52, 5.87) |
| Q3                        | 23   | 0.98 (0.63, 1.53) | 10  | 1.06 (0.50, 2.27) |
| Q4                        | 23   | 1.00 (0.64, 1.56) | 9   | 0.72 (0.33, 1.57) |
| p-trend                   |      | 0.97              |     | 0.47              |
| <u>Methyl bromide</u>     |      |                   |     |                   |
| Nonexposed                | 1570 | Ref               | 750 | Ref               |
| Q1                        | 72   | 0.94 (0.73, 1.20) | 30  | 1.17 (0.80, 1.71) |
| Q2                        | 69   | 0.90 (0.70, 1.16) | 30  | 0.79 (0.53, 1.18) |
| Q3                        | 70   | 0.94 (0.73, 1.21) | 30  | 1.10 (0.74, 1.63) |
| Q4                        | 70   | 0.94 (0.73, 1.21) | 29  | 0.93 (0.63, 1.38) |
| p-trend                   |      | 0.66              |     | 0.78              |
| <u>Aluminum Phosphide</u> |      |                   |     |                   |
| Nonexposed                | 959  | Ref               | 445 | Ref               |
| T1                        | 10   | 1.07 (0.57, 1.99) | 10  | 1.58 (0.84, 2.96) |
| T2                        | 11   | 0.64 (0.35, 1.17) | 8   | 0.78 (0.39, 1.57) |
| T3                        | 9    | 0.85 (0.44, 1.65) |     |                   |

|                           |      |                   |     |                   |
|---------------------------|------|-------------------|-----|-------------------|
| p-trend                   |      | 0.49              |     | 0.53              |
| <u>Mix 80/20</u>          |      |                   |     |                   |
| Nonexposed                | 912  | Ref               | 425 | Ref               |
| Q1                        | 25   | 1.73 (1.16, 2.58) | 10  | 1.71 (0.88, 3.32) |
| Q2                        | 24   | 1.15 (0.76, 1.73) | 9   | 1.54 (0.79, 2.99) |
| Q3                        | 23   | 1.05 (0.69, 1.59) | 9   | 0.84 (0.42, 1.69) |
| Q4                        |      |                   | 9   | 1.44 (0.74, 2.79) |
| p-trend                   |      | 0.79              |     | 0.33              |
| <u>Ethylene Dibromide</u> |      |                   |     |                   |
| Nonexposed                | 953  | Ref               | 447 | Ref               |
| T1                        | 13   | 1.16 (0.67, 2.01) | 7   | 0.89 (0.39, 2.00) |
| T2                        | 13   | 1.18 (0.68, 2.05) | 7   | 0.56 (0.26, 1.20) |
| T3                        | 11   | 0.44 (0.24, 0.81) |     |                   |
| p-trend                   |      | 0.009             |     | 0.13              |
| <u>Benomyl</u>            |      |                   |     |                   |
| Nonexposed                | 904  | Ref               | 424 | Ref               |
| Q1                        | 21   | 1.06 (0.69, 1.64) | 10  | 1.33 (0.71, 2.50) |
| Q2                        | 20   | 1.00 (0.64, 1.57) | 9   | 0.93 (0.47, 1.81) |
| Q3                        | 21   | 1.36 (0.88, 2.12) | 10  | 1.20 (0.61, 2.35) |
| Q4                        | 20   | 0.71 (0.45, 1.11) | 9   | 1.18 (0.62, 2.24) |
| p-trend                   |      | 0.19              |     | 0.59              |
| <u>Chlorothalonil</u>     |      |                   |     |                   |
| Nonexposed                | 1720 | Ref               | 797 | Ref               |
| Q1                        | 37   | 0.87 (0.61, 1.24) | 18  | 1.09 (0.63, 1.89) |
| Q2                        | 34   | 1.25 (0.88, 1.76) | 17  | 1.82 (1.09, 3.03) |
| Q3                        | 36   | 0.86 (0.62, 1.21) | 17  | 1.00 (0.61, 1.65) |
| Q4                        | 35   | 0.88 (0.62, 1.23) | 17  | 1.09 (0.67, 1.79) |
| p-trend                   |      | 0.39              |     | 0.72              |
| <u>Captan</u>             |      |                   |     |                   |
| Nonexposed                | 1508 | Ref               | 692 | Ref               |
| Q1                        | 44   | 1.07 (0.78, 1.45) | 23  | 0.86 (0.57, 1.32) |
| Q2                        | 41   | 1.05 (0.77, 1.44) | 23  | 1.90 (1.21, 2.98) |
| Q3                        | 43   | 1.10 (0.81, 1.49) | 23  | 1.39 (0.91, 2.12) |
| Q4                        | 42   | 0.96 (0.70, 1.33) | 23  | 1.35 (0.87, 2.08) |
| p-trend                   |      | 0.86              |     | 0.14              |
| <u>Maneb/Mancozeb</u>     |      |                   |     |                   |
| Nonexposed                | 907  | Ref               | 425 | Ref               |
| Q1                        | 20   | 0.86 (0.54, 1.36) | 11  | 1.14 (0.62, 2.10) |
| Q2                        | 20   | 0.89 (0.55, 1.42) | 8   | 1.10 (0.54, 2.23) |
| Q3                        | 20   | 0.84 (0.54, 1.31) | 9   | 1.59 (0.81, 3.14) |
| Q4                        | 19   | 0.83 (0.52, 1.32) | 9   | 0.67 (0.34, 1.31) |
| p-trend                   |      | 0.41              |     | 0.29              |
| <u>Metalaxyl</u>          |      |                   |     |                   |
| Nonexposed                | 791  | Ref               | 379 | Ref               |
| Q1                        | 50   | 0.96 (0.72, 1.28) | 23  | 1.04 (0.68, 1.58) |
| Q2                        | 49   | 1.01 (0.74, 1.37) | 22  | 1.04 (0.65, 1.66) |
| Q3                        | 49   | 1.11 (0.82, 1.51) | 22  | 1.19 (0.75, 1.88) |
| Q4                        | 49   | 1.03 (0.76, 1.40) | 22  | 1.13 (0.70, 1.82) |
| p-trend                   |      | 0.78              |     | 0.59              |

Abbreviations: Agricultural Health Study (AHS); Prostate Cancer (PCA); quartile 1 (Q1); quartile 2 (Q2); quartile 3 (Q3); quartile 4 (Q4).

<sup>a</sup>Distant Stage OR Poorly differentiated (after 1/1/2003 Gleason 7-10) OR Gleason  $\geq$ 7 OR Fatal (underlying cause-prostate cancer)

<sup>b</sup>Numbers do not sum to total due to missing data.

<sup>c</sup>Adjusted for age, state, race, family history of prostate cancer, smoking, fruit servings, and leisure time physical activity in the winter

Web Table 3. Cumulative Lifetime Pesticide Exposure and Risk of Total Prostate Cancer by Family History of Prostate Cancer in the Agricultural Health Study

| FAMILY HISTORY     | Intensity Weighted Days<br>NO |                          | Intensity Weighted Days<br>YES |                          | p-interaction |
|--------------------|-------------------------------|--------------------------|--------------------------------|--------------------------|---------------|
|                    | Cases <sup>a</sup>            | RR <sup>b</sup> (95% CI) | Cases <sup>a</sup>             | RR <sup>b</sup> (95% CI) |               |
| <u>Dicamba</u>     |                               |                          |                                |                          |               |
| Nonexposed         | 638                           | Ref                      | 122                            | Ref                      |               |
| Q1                 | 163                           | 0.97 (0.81, 1.17)        | 42                             | 1.17 (0.80, 1.71)        |               |
| Q2                 | 163                           | 0.93 (0.76, 1.13)        | 37                             | 0.90 (0.60, 1.33)        |               |
| Q3                 | 154                           | 0.88 (0.73, 1.07)        | 44                             | 1.02 (0.70, 1.49)        |               |
| Q4                 | 160                           | 1.05 (0.87, 1.27)        | 42                             | 1.20 (0.82, 1.75)        |               |
| p-trend            |                               | 0.55                     |                                | 0.37                     | 0.22          |
| <u>Chlorimuron</u> |                               |                          |                                |                          |               |
| Nonexposed         | 530                           | Ref                      | 114                            | Ref                      |               |
| Q1                 | 58                            | 0.99 (0.75, 1.32)        | 17                             | 1.29 (0.77, 2.15)        |               |
| Q2                 | 53                            | 0.98 (0.74, 1.30)        | 18                             | 1.56 (0.92, 2.62)        |               |
| Q3                 | 56                            | 1.02 (0.76, 1.37)        | 9                              | 0.65 (0.32, 1.32)        |               |
| Q4                 | 54                            | 0.90 (0.68, 1.20)        | 11                             | 0.79 (0.43, 1.48)        |               |
| p-trend            |                               | 0.51                     |                                | 0.32                     | 0.11          |
| <u>Metolachlor</u> |                               |                          |                                |                          |               |
| Nonexposed         | 716                           | Ref                      | 134                            | Ref                      |               |
| Q1                 | 137                           | 0.94 (0.78, 1.13)        | 40                             | 1.43 (0.99, 2.08)        |               |
| Q2                 | 151                           | 1.05 (0.87, 1.25)        | 30                             | 0.99 (0.65, 1.51)        |               |
| Q3                 | 140                           | 0.92 (0.76, 1.10)        | 41                             | 1.15 (0.78, 1.69)        |               |
| Q4                 | 144                           | 0.86 (0.72, 1.03)        | 37                             | 1.04 (0.72, 1.52)        |               |
| p-trend            |                               | 0.10                     |                                | 0.96                     | 0.53          |
| <u>EPTC</u>        |                               |                          |                                |                          |               |
| Nonexposed         | 1064                          | Ref                      | 207                            | Ref                      |               |
| Q1                 | 60                            | 1.03 (0.79, 1.34)        | 14                             | 0.95 (0.55, 1.64)        |               |
| Q2                 | 54                            | 1.16 (0.88, 1.53)        | 21                             | 1.70 (1.08, 2.68)        |               |
| Q3                 | 50                            | 0.86 (0.65, 1.15)        | 20                             | 1.12 (0.70, 1.79)        |               |
| Q4                 | 50                            | 0.81 (0.61, 1.08)        | 20                             | 1.28 (0.80, 2.03)        |               |
| p-trend            |                               | 0.12                     |                                | 0.29                     | 0.22          |
| <u>Alachlor</u>    |                               |                          |                                |                          |               |
| Nonexposed         | 587                           | Ref                      | 105                            | Ref                      |               |
| Q1                 | 172                           | 0.92 (0.77, 1.09)        | 45                             | 1.21 (0.85, 1.73)        |               |
| Q2                 | 175                           | 1.01 (0.85, 1.20)        | 47                             | 1.26 (0.89, 1.79)        |               |
| Q3                 | 186                           | 1.04 (0.88, 1.22)        | 30                             | 0.82 (0.54, 1.24)        |               |
| Q4                 | 165                           | 0.92 (0.77, 1.09)        | 49                             | 1.38 (0.98, 1.94)        |               |
| p-trend            |                               | 0.46                     |                                | 0.16                     | 0.11          |
| <u>Metribuzin</u>  |                               |                          |                                |                          |               |
| Nonexposed         | 469                           | Ref                      | 87                             | Ref                      |               |
| Q1                 | 67                            | 0.90 (0.69, 1.18)        | 18                             | 1.05 (0.62, 1.78)        |               |
| Q2                 | 65                            | 1.07 (0.82, 1.40)        | 24                             | 1.61 (1.00, 2.58)        |               |
| Q3                 | 70                            | 0.94 (0.73, 1.22)        | 18                             | 0.88 (0.51, 1.49)        |               |
| Q4                 | 69                            | 1.03 (0.79, 1.33)        | 20                             | 1.43 (0.87, 2.37)        |               |
| p-trend            |                               | 0.85                     |                                | 0.27                     | 0.33          |
| <u>Paraquat</u>    |                               |                          |                                |                          |               |
| Nonexposed         | 618                           | Ref                      | 146                            | Ref                      |               |
| Q1                 | 37                            | 1.08 (0.77, 1.52)        | 5                              | 0.62 (0.25, 1.52)        |               |
| Q2                 | 31                            | 0.93 (0.64, 1.35)        | 4                              | **                       |               |
| Q3                 | 28                            | 0.83 (0.56, 1.24)        | 9                              | 1.13 (0.56, 2.28)        |               |
| Q4                 | 32                            | 0.96 (0.65, 1.40)        | 6                              | 1.13 (0.48, 2.66)        |               |
| p-trend            |                               | 0.74                     |                                | 0.67                     | 0.59          |



|                      |     |                   |     |                   |      |
|----------------------|-----|-------------------|-----|-------------------|------|
| <u>Petroleum Oil</u> |     |                   |     |                   |      |
| Nonexposed           | 587 | Ref               | 124 | Ref               |      |
| Q1                   | 34  | 0.81 (0.56, 1.16) | 13  | 1.39 (0.78, 2.48) |      |
| Q2                   | 40  | 1.15 (0.83, 1.59) | 10  | 1.31 (0.68, 2.51) |      |
| Q3                   | 38  | 1.02 (0.73, 1.41) | 10  | 1.14 (0.60, 2.18) |      |
| Q4                   | 36  | 1.11 (0.80, 1.56) | 9   | 0.97 (0.49, 1.91) |      |
| p-trend              |     | 0.49              |     | 0.89              | 0.66 |
| <u>Pendimethalin</u> |     |                   |     |                   |      |
| Nonexposed           | 483 | Ref               | 101 | Ref               |      |
| Q1                   | 76  | 0.86 (0.67, 1.10) | 22  | 0.92 (0.54, 1.55) |      |
| Q2                   | 73  | 0.87 (0.67, 1.13) | 21  | 1.19 (0.73, 1.94) |      |
| Q3                   | 76  | 0.87 (0.66, 1.14) | 13  | 0.70 (0.38, 1.28) |      |
| Q4                   | 69  | 1.03 (0.80, 1.33) | 21  | 1.61 (1.00, 2.60) |      |
| p-trend              |     | 0.78              |     | 0.07              | 0.62 |
| <u>Imazethapyr</u>   |     |                   |     |                   |      |
| Nonexposed           | 796 | Ref               | 153 | Ref               |      |
| Q1                   | 122 | 0.97 (0.79, 1.19) | 32  | 1.09 (0.72, 1.65) |      |
| Q2                   | 127 | 1.07 (0.87, 1.31) | 26  | 0.92 (0.59, 1.43) |      |
| Q3                   | 112 | 1.04 (0.84, 1.28) | 41  | 1.26 (0.87, 1.84) |      |
| Q4                   | 127 | 1.01 (0.82, 1.23) | 27  | 0.91 (0.58, 1.43) |      |
| p-trend              |     | 0.90              |     | 0.81              | 0.99 |
| <u>Glyphosate</u>    |     |                   |     |                   |      |
| Nonexposed           | 280 | Ref               | 48  | Ref               |      |
| Q1                   | 255 | 0.89 (0.75, 1.06) | 61  | 1.00 (0.65, 1.53) |      |
| Q2                   | 251 | 0.93 (0.77, 1.12) | 65  | 1.01 (0.68, 1.50) |      |
| Q3                   | 270 | 1.01 (0.85, 1.20) | 61  | 1.00 (0.68, 1.48) |      |
| Q4                   | 280 | 1.02 (0.86, 1.21) | 60  | 0.95 (0.64, 1.40) |      |
| p-trend              |     | 0.27              |     | 0.71              | 0.86 |
| <u>2,4,5-TP</u>      |     |                   |     |                   |      |
| Nonexposed           | 687 | Ref               | 157 | Ref               |      |
| T1                   | 11  | 0.64 (0.34, 1.20) | 6   | 1.10 (0.45, 2.68) |      |
| T2                   | 15  | 1.20 (0.72, 2.01) | 3   | **                |      |
| T3                   | 13  | 0.92 (0.54, 1.57) | 1   | **                |      |
| p-trend              |     | 0.82              |     | 0.19              | 0.33 |
| <u>Butylate</u>      |     |                   |     |                   |      |
| Nonexposed           | 561 | Ref               | 110 | Ref               |      |
| Q1                   | 42  | 0.66 (0.48, 0.91) | 16  | 1.02 (0.60, 1.74) |      |
| Q2                   | 51  | 1.05 (0.78, 1.40) | 7   | 0.48 (0.22, 1.02) |      |
| Q3                   | 35  | 1.01 (0.72, 1.43) | 21  | 2.20 (1.35, 3.56) |      |
| Q4                   | 46  | 1.23 (0.91, 1.66) | 9   | 1.03 (0.52, 2.04) |      |
| p-trend              |     | 0.14              |     | 0.40              | 0.01 |
| <u>Trifluralin</u>   |     |                   |     |                   |      |
| Nonexposed           | 611 | Ref               | 112 | Ref               |      |
| Q1                   | 172 | 0.95 (0.80, 1.13) | 41  | 1.01 (0.69, 1.47) |      |
| Q2                   | 170 | 1.06 (0.88, 1.26) | 41  | 1.00 (0.69, 1.45) |      |
| Q3                   | 170 | 1.04 (0.87, 1.24) | 41  | 0.85 (0.58, 1.23) |      |
| Q4                   | 161 | 0.93 (0.78, 1.12) | 43  | 1.04 (0.72, 1.49) |      |
| p-trend              |     | 0.52              |     | 0.92              | 0.69 |
| <u>2,4-D</u>         |     |                   |     |                   |      |
| Nonexposed           | 290 | Ref               | 43  | Ref               |      |
| Q1                   | 262 | 0.93 (0.78, 1.11) | 60  | 1.21 (0.80, 1.82) |      |
| Q2                   | 256 | 0.88 (0.74, 1.05) | 68  | 1.29 (0.85, 1.95) |      |
| Q3                   | 287 | 1.03 (0.86, 1.22) | 51  | 0.86 (0.56, 1.31) |      |
| Q4                   | 260 | 0.87 (0.73, 1.03) | 73  | 1.17 (0.78, 1.75) |      |

|                           |      |                   |     |                   |      |
|---------------------------|------|-------------------|-----|-------------------|------|
| p-trend                   |      | 0.25              |     | 0.90              | 0.42 |
| <u>2,4,5-T</u>            |      |                   |     |                   |      |
| Nonexposed                | 544  | Ref               | 121 | Ref               |      |
| Q1                        | 43   | 1.23 (0.90, 1.68) | 18  | 2.03 (1.22, 3.37) |      |
| Q2                        | 45   | 1.05 (0.77, 1.43) | 11  | 1.13 (0.61, 2.10) |      |
| Q3                        | 45   | 0.96 (0.71, 1.30) | 10  | 0.93 (0.48, 1.78) |      |
| Q4                        | 50   | 0.90 (0.68, 1.21) | 6   | 0.49 (0.21, 1.11) |      |
| p-trend                   |      | 0.43              |     | 0.06              | 0.22 |
| <u>Permethrin crop</u>    |      |                   |     |                   |      |
| Nonexposed                | 1141 | Ref               | 239 | Ref               |      |
| Q1                        | 37   | 0.93 (0.66, 1.29) | 11  | 0.92 (0.47, 1.81) |      |
| Q2                        | 40   | 1.12 (0.82, 1.54) | 7   | 0.77 (0.32, 1.87) |      |
| Q3                        | 36   | 0.79 (0.56, 1.11) | 11  | 1.30 (0.69, 2.44) |      |
| Q4                        | 33   | 0.91 (0.64, 1.29) | 11  | 1.52 (0.83, 2.78) |      |
| p-trend                   |      | 0.46              |     | 0.15              | 0.16 |
| <u>Permethrin animal</u>  |      |                   |     |                   |      |
| Nonexposed                | 1183 | Ref               | 246 | Ref               |      |
| Q1                        | 37   | 1.10 (0.76, 1.58) | 6   | 0.52 (0.19, 1.41) |      |
| Q2                        | 32   | 1.16 (0.80, 1.67) | 10  | 1.27 (0.61, 2.64) |      |
| Q3                        | 33   | 1.14 (0.80, 1.62) | 9   | 1.05 (0.52, 2.14) |      |
| Q4                        | 35   | 0.86 (0.61, 1.21) | 7   | 0.69 (0.34, 1.40) | 0.78 |
| p-trend                   |      | 0.48              |     | 0.35              |      |
| <u>Carbofuran</u>         |      |                   |     |                   |      |
| Nonexposed                | 891  | Ref               | 169 | Ref               |      |
| Q1                        | 112  | 1.00 (0.82, 1.22) | 20  | 0.75 (0.46, 1.22) |      |
| Q2                        | 91   | 1.10 (0.89, 1.36) | 28  | 1.79 (1.21, 2.66) |      |
| Q3                        | 102  | 1.13 (0.92, 1.39) | 29  | 1.33 (0.89, 1.99) |      |
| Q4                        | 98   | 0.88 (0.71, 1.08) | 32  | 1.11 (0.76, 1.61) |      |
| p-trend                   |      | 0.30              |     | 0.49              | 0.28 |
| <u>Carbaryl</u>           |      |                   |     |                   |      |
| Nonexposed                | 357  | Ref               | 86  | Ref               |      |
| Q1                        | 100  | 1.04 (0.83, 1.31) | 30  | 1.08 (0.70, 1.67) |      |
| Q2                        | 107  | 1.15 (0.91, 1.47) | 23  | 1.09 (0.67, 1.76) |      |
| Q3                        | 100  | 1.23 (0.96, 1.56) | 22  | 1.32 (0.79, 2.18) |      |
| Q4                        | 101  | 0.98 (0.75, 1.27) | 12  | 0.49 (0.25, 0.97) |      |
| p-trend                   |      | 0.59              |     | 0.03              | 0.19 |
| <u>Aldicarb</u>           |      |                   |     |                   |      |
| Nonexposed                | 674  | Ref               | 154 | Ref               |      |
| Q1                        | 16   | 0.87 (0.53, 1.44) | 3   | **                |      |
| Q2                        | 17   | 1.65 (1.01, 2.72) | 1   | **                |      |
| Q3                        | 17   | 0.98 (0.59, 1.63) | 3   | **                |      |
| Q4                        | 15   | 0.83 (0.47, 1.45) | 3   | **                |      |
| p-trend                   |      | 0.56              |     |                   |      |
| <u>Methyl bromide</u>     |      |                   |     |                   |      |
| Nonexposed                | 1166 | Ref               | 245 | Ref               |      |
| Q1                        | 48   | 0.88 (0.65, 1.19) | 16  | 1.58 (0.92, 2.73) |      |
| Q2                        | 48   | 0.84 (0.62, 1.14) | 11  | 1.22 (0.64, 2.34) |      |
| Q3                        | 45   | 0.81 (0.60, 1.11) | 13  | 2.00 (1.10, 3.67) |      |
| Q4                        | 55   | 1.00 (0.75, 1.33) | 10  | 1.10 (0.55, 2.17) |      |
| p-trend                   |      | 0.97              |     | 0.79              | 0.10 |
| <u>Aluminum Phosphide</u> |      |                   |     |                   |      |
| Nonexposed                | 710  | Ref               | 157 | Ref               |      |
| T1                        | 6    | 0.82 (0.37, 1.84) | 4   | **                |      |
| T2                        | 8    | 0.60 (0.29, 1.23) | 3   | **                |      |

|                           |      |                   |     |                   |      |
|---------------------------|------|-------------------|-----|-------------------|------|
| T3                        | 6    | 0.83 (0.37, 1.86) | 1   | **                |      |
| p-trend                   |      | 0.50              |     |                   |      |
| <u>Mix 80/20</u>          |      |                   |     |                   |      |
| Nonexposed                | 675  | Ref               | 147 | Ref               |      |
| T1                        | 18   | 1.71 (1.07, 2.74) | 7   | 2.34 (1.08, 5.06) |      |
| T2                        | 17   | 0.98 (0.61, 1.59) | 6   | 2.07 (0.90, 4.72) |      |
| T3                        | 16   | 0.98 (0.60, 1.62) | 4   | 0.96 (0.35, 2.67) |      |
| p-trend                   |      | 0.93              |     | 0.92              | 0.69 |
| <u>Ethylene Dibromide</u> |      |                   |     |                   |      |
| Nonexposed                | 699  | Ref               | 160 | Ref               |      |
| T1                        | 10   | 1.22 (0.65, 2.28) | 3   | **                |      |
| T2                        | 11   | 1.50 (0.82, 2.75) | 0   | **                |      |
| T3                        | 8    | 0.46 (0.23, 0.93) | 2   | **                |      |
| p-trend                   |      | 0.04              |     |                   |      |
| <u>Benomyl</u>            |      |                   |     |                   |      |
| Nonexposed                | 665  | Ref               | 156 | Ref               |      |
| Q1                        | 15   | 1.02 (0.61, 1.71) | 2   | **                |      |
| Q2                        | 14   | 0.98 (0.57, 1.67) | 1   | **                |      |
| Q3                        | 16   | 1.33 (0.80, 2.20) | 2   | **                |      |
| Q4                        | 16   | 0.76 (0.46, 1.26) | 3   | **                |      |
| p-trend                   |      | 0.37              |     |                   |      |
| <u>Chlorothalonil</u>     |      |                   |     |                   |      |
| Nonexposed                | 1262 | Ref               | 275 | Ref               |      |
| Q1                        | 27   | 0.86 (0.57, 1.30) | 8   | 1.92 (0.91, 4.03) |      |
| Q2                        | 24   | 1.21 (0.80, 1.82) | 6   | 1.69 (0.74, 3.87) |      |
| Q3                        | 23   | 0.75 (0.49, 1.15) | 8   | 1.41 (0.68, 2.92) |      |
| Q4                        | 28   | 0.96 (0.65, 1.40) | 3   | **                |      |
| p-trend                   |      | 0.65              |     | 0.29              | 0.16 |
| <u>Captan</u>             |      |                   |     |                   |      |
| Nonexposed                | 1174 | Ref               | 246 | Ref               |      |
| Q1                        | 37   | 1.11 (0.79, 1.54) | 7   | 0.88 (0.39, 1.99) |      |
| Q2                        | 31   | 0.98 (0.68, 1.41) | 7   | 1.25 (0.61, 2.54) |      |
| Q3                        | 33   | 1.14 (0.81, 1.62) | 7   | 0.96 (0.44, 2.12) |      |
| Q4                        | 32   | 1.00 (0.69, 1.45) | 8   | 0.96 (0.47, 1.96) |      |
| p-trend                   |      | 0.93              |     | 0.90              | 0.84 |
| <u>Maneb/Mancozeb</u>     |      |                   |     |                   |      |
| Nonexposed                | 663  | Ref               | 155 | Ref               |      |
| Q1                        | 17   | 1.04 (0.63, 1.73) | 2   | **                |      |
| Q2                        | 15   | 0.92 (0.53, 1.60) | 3   | **                |      |
| Q3                        | 15   | 0.88 (0.53, 1.47) | 4   | **                |      |
| Q4                        | 14   | 0.93 (0.54, 1.60) | 3   | **                |      |
| p-trend                   |      | 0.75              |     |                   |      |
| <u>Metalaxyl</u>          |      |                   |     |                   |      |
| Nonexposed                | 588  | Ref               | 142 | Ref               |      |
| Q1                        | 34   | 0.9 (0.63, 1.27)  | 9   | 1.1 (0.56, 2.18)  |      |
| Q2                        | 37   | 1.12 (0.78, 1.61) | 4   | **                |      |
| Q3                        | 36   | 1.13 (0.79, 1.63) | 5   | 0.86 (0.34, 2.20) |      |
| Q4                        | 35   | 1.07 (0.74, 1.54) | 6   | 0.95 (0.40, 2.25) |      |
| p-trend                   |      | 0.66              |     | 0.89              | 0.67 |

Abbreviations: quartile 1 (Q1); quartile 2 (Q2); quartile 3 (Q3); quartile 4 (Q4).

<sup>a</sup>Numbers do not sum to total due to missing data.

<sup>b</sup>Adjusted for age, state, race, smoking, fruit servings, and leisure time physical activity in the winter
